# Supplementary material for: Insights into the phylogenetic relationships and species boundaries of the Myricaria squamosa complex (Tamaricaceae) based on the complete chloroplast genome
Source: PeerJ journal article supplement (doi:10.7717/peerj.16642), 2023-12-11

- The *M. squamosa* complex (P1)
- The *M. squamosa* complex (P2)
- *M. laxiflora* (P3)
- *M. wardii* (P4)
- *M. rosea* (P5)
- *M. elegans* (P6)

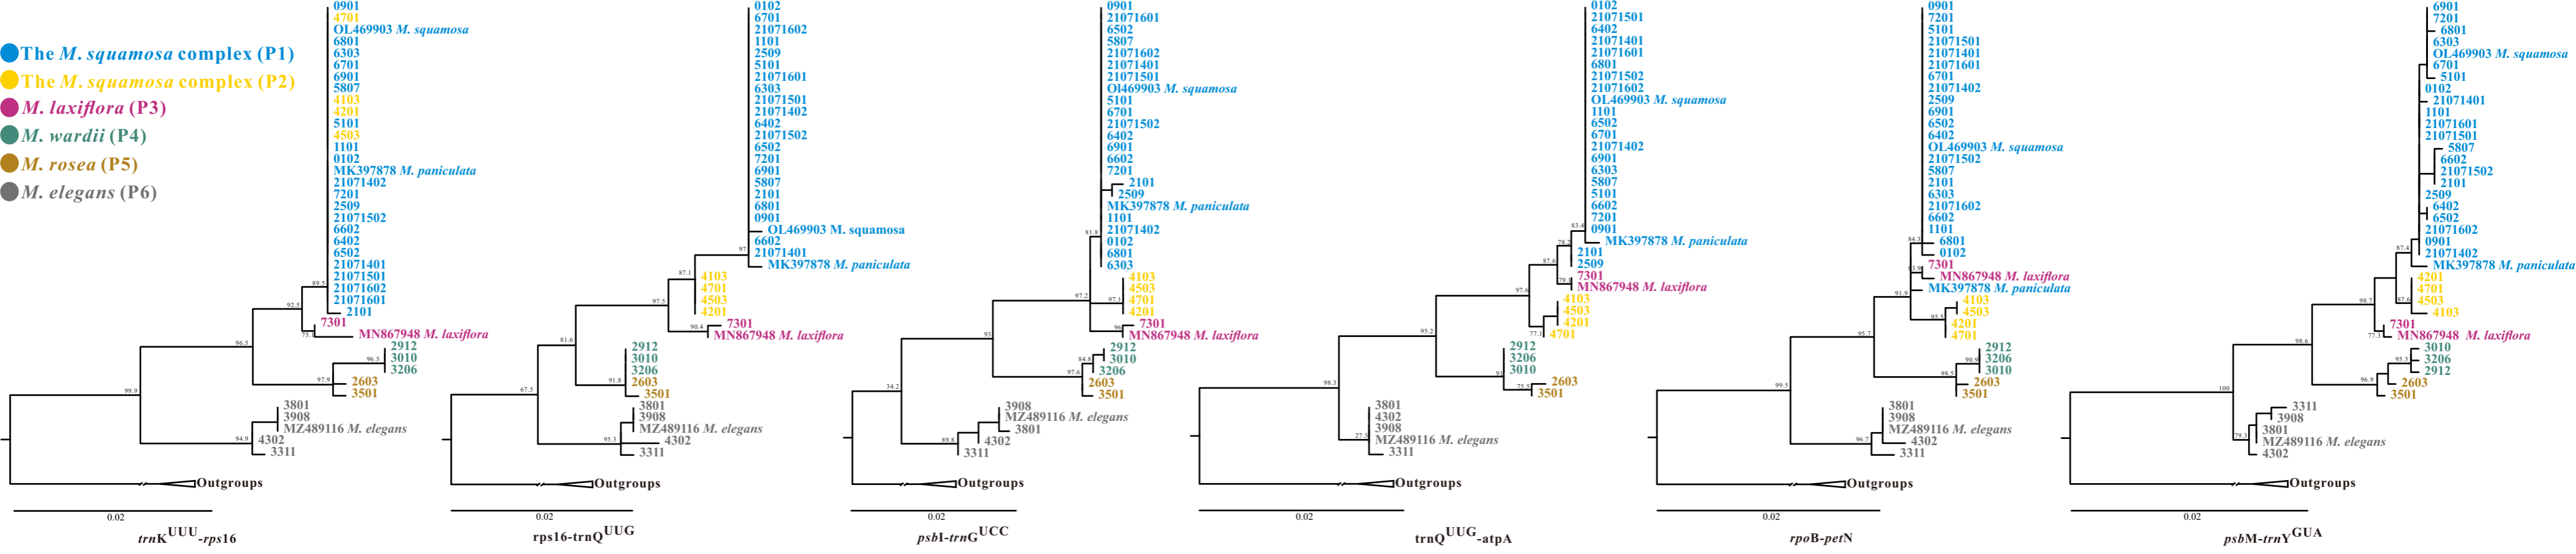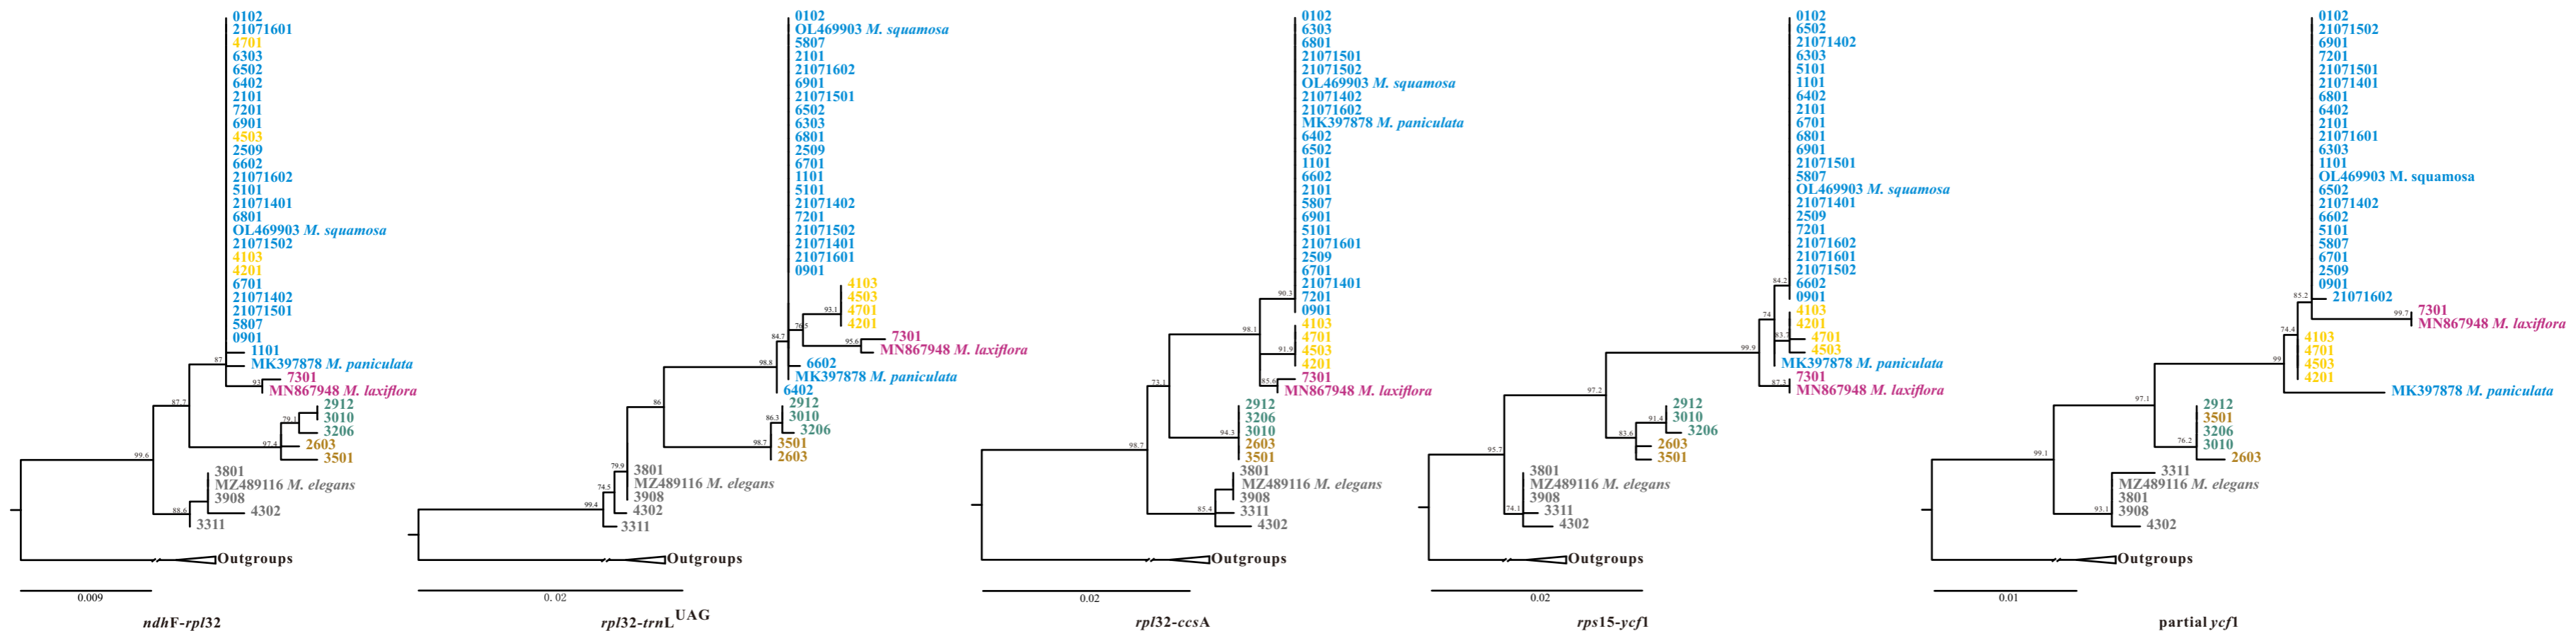

Supplement: Figure_S1-11group-specific-barcodes_1110.pdf [file Figure_S1-11group-specific-barcodes_1110.pdf]
