# Supplementary material for: Insights into the phylogenetic relationships and species boundaries of the Myricaria squamosa complex (Tamaricaceae) based on the complete chloroplast genome
Source: PeerJ. 2023 Dec 11;11:e16642. doi: 10.7717/peerj.16642 (PMC10720482; doi:10.7717/peerj.16642)
Supplement: Supplemental Information 2 [file peerj-11-16642-s002.xlsx]

## Sheet: Sheet1
Table S1. Accessions of Myricaria used in this study with locations, vouchers, GenBank accession numbers, and nrITS and plastome characteristics.
Original taxon	The finally defined cluster	The finally taxon suggested in this study	Individuals	Sample ID	Voucher	Lat. (°E), Long. (°N)	Alt. (m)	ITS GenBanke accession	ITS Length (bp)	Plastome GenBank accession	Size				GC content （%）				Number of genes
											Total	LSC	SSC	IR	Total	LSC	SSC	IR	Total (unique gene)	PCG (unique gene)	tRNA (unique gene)	rRNA (unique gene)
Myricaria squamosa Desvaux	P1-P2	M. squamosa	6	6701	2020-19	95.50441, 37.63822	3176	OP763830	709	OP778386	154714	84403	18303	26004	36.3	34.1	29.5	42.4	135 (115)	90 (81)	37 (30)	8 (4)
				0102	Hu-Hao-2019002	102.06028, 29.78194	2440	OP763799	709	OP756567	154640	84330	18302	26004	36.3	34.1	29.6	42.4	135 (115)	90 (81)	37 (30)	8 (4)
				0901	Hu-Hao-2019010	98.85194, 31.94917	3910	OP763800	709	OP778387	154716	84403	18305	26004	36.3	34.1	29.5	42.4	135 (115)	90 (81)	37 (30)	8 (4)
				7201	2020-24	100.47618, 37.21925	3222	OP763833	709	OP778388	154695	84384	18303	26004	36.3	34.1	29.5	42.4	135 (115)	90 (81)	37 (30)	8 (4)
				4103	20190908-2	77.48296, 36.4055	4038	OP763819	709	OP778389	154485	84216	18251	26009	36.3	34	29.5	42.4	135 (115)	90 (81)	37 (30)	8 (4)
				AY572414 (ITS) / OL469903 (plastome)	—	—	—	Ay572414	690	OL469903	154689	84390	18303	25998	36.3	34.1	29.5	42.4	130 (113)	85 (79)	37 (30)	8 (4)
M. paniculata P. Y. Zhang & Y. J. Zhang			7	5807	2020-10	100.63382, 36.22799	2673	OP763825	709	OP778390	154688	84377	18303	26004	36.3	34.1	29.5	42.4	135 (115)	90 (81)	37 (30)	8 (4)
				2509	Hu-Hao-2019026	95.72243, 29.8427	3088	OP763810	709	OP778391	154691	84384	18305	26001	36.3	34.1	29.5	42.4	135 (115)	90 (81)	37 (30)	8 (4)
				2101	Hu-Hao-2019022	97.12770, 30.02754	2908	OP763802	709	OP778392	154695	84387	18306	26001	36.3	34.1	29.5	42.4	135 (115)	90 (81)	37 (30)	8 (4)
				1101	Hu-Hao-2019012	100.68917, 31.38639	3170	OP763801	709	OP778393	154715	84407	18300	26004	36.3	34.1	29.5	42.4	135 (115)	90 (81)	37 (30)	8 (4)
				4201	20190908-3	77.35354, 36.43781	4009	OP763820	709	OP778394	154693	84424	18251	26009	36.3	34	29.5	42.4	135 (115)	90 (81)	37 (30)	8 (4)
				5101	2020-03	102.90548, 35.06660	2837	OP763824	709	OP778395	154695	84382	18305	26004	36.3	34.1	29.5	42.4	135 (115)	90 (81)	37 (30)	8 (4)
				Eu240600 (ITS) / MK397878 (plastome)	—	—	—	EU240600	686	MK397878	154651	84380	20583	24844	36.3	34.1	30.1	42.7	130 (113)	85 (79)	37 (30)	8 (4)
M. bracteata Royle			14	21071501	2021071501	114.31151, 40.88966	1080	OP763805	709	OP778396	154689	84387	18308	25997	36.3	34.1	29.5	42.4	135 (115)	90 (81)	37 (30)	8 (4)
				21071601	2021071601	111.69801, 40.92952	1174	OP763807	709	OP778397	154689	84387	18308	25997	36.3	34.1	29.5	42.4	135 (115)	90 (81)	37 (30)	8 (4)
				21071401	2021071401	113.45435, 39.48498	1379	OP763803	709	OP778398	154685	84376	18315	25997	36.3	34.1	29.5	42.4	135 (115)	90 (81)	37 (30)	8 (4)
				6801	2020-20	97.45457, 37.37898	2970	OP763831	709	OP778399	154680	84369	18303	26004	36.3	34.1	29.5	42.4	135 (115)	90 (81)	37 (30)	8 (4)
				6303	2020-15	96.44992, 36.38342	2786	OP763826	709	OP778400	154691	84380	18303	26004	36.3	34.1	29.5	42.4	135 (115)	90 (81)	37 (30)	8 (4)
				6602	2020-18	95.08780, 38.01211	3209	OP763829	709	OP778401	154687	84375	18304	26004	36.3	34.1	29.5	42.4	135 (115)	90 (81)	37 (30)	8 (4)
				21071502	2021071502	114.07144, 40.99392	1232	OP763806	709	OP778402	154693	84379	18309	26004	36.3	34.1	29.5	42.4	135 (115)	90 (81)	37 (30)	8 (4)
				21071402	2021071402	114.07498, 39.68967	1261	OP763804	709	OP778403	154709	84382	18319	26004	36.3	34.1	29.5	42.4	135 (115)	90 (81)	37 (30)	8 (4)
				6402	2020-16	94.79612, 36.32007	2864	OP763827	709	OP778404	154674	84376	18308	25995	36.3	34.1	29.5	42.4	135 (115)	90 (81)	37 (30)	8 (4)
				6502	2020-17	95.36791, 37.81393	3135	OP763828	709	OP778405	154691	84376	18307	26004	36.3	34.1	29.5	42.4	135 (115)	90 (81)	37 (30)	8 (4)
				6901	2020-21	98.50615, 36.95426	2962	OP763832	709	OP778406	154689	84377	18304	26004	36.3	34.1	29.5	42.4	135 (115)	90 (81)	37 (30)	8 (4)
				21071602	2021071602	111.29635, 40.77432	1093	OP763808	709	OP778407	154689	84387	18304	25999	36.3	34.1	29.5	42.4	135 (115)	90 (81)	37 (30)	8 (4)
				4503	20190909-1	78.32009, 37.053312	2210	OP763821	709	OP778408	154710	84441	18251	26009	36.3	34	29.5	42.4	135 (115)	90 (81)	37 (30)	8 (4)
				4701	20190913	76.13688, 39.71002	1330	OP763823	709	OP778409	154713	84444	18251	26009	36.3	34	29.5	42.4	135 (115)	90 (81)	37 (30)	8 (4)
M. laxiflora (Franchet) P. Y. Zhang & Y. J. Zhang	P3	M. laxiflora	2	7301	20201031	105.01382, 28.7625	285	OP763833	709	OP778385	154897	84727	18238	25966	36.3	34	29.6	42.4	133 (114)	88 (80)	37 (30)	8 (4)
				EU240610 (ITS) / MN867948 (plastome)	—	—	—	EU240610	686	MN867948	154971	84708	18261	26004	36.3	34	29.6	42.4	130 (113)	85 (79)	37 (30)	8 (4)
M. wardii Marquand	P4	M. wardii	3	3010	Hu-Hao-2019030	93.25710, 29.88209	3387	OP763813	709	OP778412	155284	84704	18282	26149	36.3	34.1	29.6	42.3	133 (114)	88 (80)	37 (30)	8 (4)
				2912	Hu-Hao-2019029	94.48820, 29.57146	2966	OP763812	709	OP778413	155301	84721	18282	26149	36.3	34.1	29.6	42.3	133 (114)	88 (80)	37 (30)	8 (4)
				3206	Hu-Hao-2019032	91.16588, 29.64201	3620	OP763814	709	OP778414	155256	84678	18280	26149	36.3	34.1	29.6	42.4	135 (115)	90 (81)	37 (30)	8 (4)
M. rosea W. W. Smith	P5	M. rosea	2	2603	Hu-Hao-2019027	95.70280, 29.80759	3361	OP763811	709	OP778410	155300	84747	18285	26134	36.3	34.1	29.6	42.4	135 (115)	90 (81)	37 (30)	8 (4)
				3501	20190903	85.28357, 28.68352	3818	OP763816	709	OP778411	155105	84539	18286	26140	36.4	34.1	29.7	42.4	135 (115)	90 (81)	37 (30)	8 (4)
M. elegans Royle	P6	M. elegans	5 plastomes / 6 ITSs	3801	20190906-3	80.30995, 31.68203	4428	OP763817	701	OP778415	155265	84824	18295	26073	36.6	34.4	29.9	42.5	135 (115)	90 (81)	37 (30)	8 (4)
				3908	20190907	80.37515, 33.71627	4402	OP763818	698	OP778416	155261	84825	18290	26073	36.6	34.4	29.9	42.5	135 (115)	90 (81)	37 (30)	8 (4)
				4302	20190908-4	76.98595, 36.90795	2760	OP763821	698	OP778417	155246	84823	18293	26065	36.6	34.4	29.9	42.5	135 (115)	90 (81)	37 (30)	8 (4)
				3311	Hu-Hao-2019033	91.76347, 29.25763	3514	OP763815	699	OP778418	155347	84757	18300	26145	36.6	34.4	29.9	42.5	135 (115)	90 (81)	37 (30)	8 (4)
				EU240594 (ITS)	—	—	—	EU240594	675	—	—	—	—	—	—	—	—	—	—	—	—	—
				EU240595 (ITS)	—	—	—	EU240595	676	—	—	—	—	—	—	—	—	—	—	—	—	—
				MZ489116 (plastome)	—	—	—	—	—	MZ489116	155245	84846	18291	26054	36.6	34.4	29.9	42.5	130 (113)	85 (79)	37 (30)	8 (4)
Note: sample ID in bold font formed a monophyletic lineage P2 and sister to the remaining samples from P1 .
