# Supplementary material for: Insights into the phylogenetic relationships and species boundaries of the Myricaria squamosa complex (Tamaricaceae) based on the complete chloroplast genome
Source: PeerJ. 2023 Dec 11;11:e16642. doi: 10.7717/peerj.16642 (PMC10720482; doi:10.7717/peerj.16642)
Supplement: Supplemental Information 4 [file peerj-11-16642-s004.xlsx]

## Sheet: Sheet1
Table S3. Relative synonymous codon usage statistics in the six chloroplast genomes of Myricaria.
Amino acid	Codons	M. squamosa complex P2 (OP778389)		M. squamosa complex P1 (OP778402)		M. elegans (OP778417)		M. laxiflora (OP778385)		M. rosea (OP778411)		M. wardii (OP778414)
		Count	RSCU	Count	RSCU	Count	RSCU	Count	RSCU	Count	RSCU	Count	RSCU
Phe	UUU	817	1.39	816	1.39	813	1.38	817	1.39	808	1.39	818	1.39
Phe	UUC	358	0.61	359	0.61	369	0.62	361	0.61	354	0.61	359	0.61
Leu	UUA	732	2.04	735	2.04	721	2	732	2.03	719	2.01	731	2.03
Leu	UUG	422	1.18	428	1.19	432	1.2	428	1.19	419	1.17	425	1.18
Leu	CUU	466	1.3	468	1.3	464	1.29	467	1.3	463	1.3	469	1.3
Leu	CUC	130	0.36	130	0.36	132	0.37	130	0.36	129	0.36	128	0.35
Leu	CUA	285	0.79	285	0.79	282	0.78	286	0.79	287	0.8	288	0.8
Leu	CUG	117	0.33	118	0.33	127	0.35	119	0.33	125	0.35	123	0.34
Ile	AUU	911	1.53	915	1.53	917	1.54	912	1.53	912	1.54	920	1.54
Ile	AUC	314	0.53	317	0.53	317	0.53	317	0.53	310	0.52	314	0.52
Ile	AUA	560	0.94	560	0.94	555	0.93	561	0.94	560	0.94	561	0.94
Met	AUG	474	1	477	1	476	1	477	1	470	1	476	1
Val	GUU	416	1.51	418	1.51	413	1.5	417	1.51	415	1.51	422	1.52
Val	GUC	112	0.41	112	0.41	118	0.43	113	0.41	113	0.41	115	0.42
Val	GUA	436	1.58	435	1.58	436	1.58	435	1.58	434	1.58	435	1.57
Val	GUG	139	0.5	139	0.5	138	0.5	138	0.5	137	0.5	135	0.49
Ser	UCU	454	1.78	455	1.77	454	1.77	453	1.76	455	1.78	458	1.78
Ser	UCC	223	0.87	227	0.88	219	0.85	226	0.88	220	0.86	225	0.87
Ser	UCA	317	1.24	319	1.24	324	1.26	317	1.23	312	1.22	316	1.23
Ser	UCG	133	0.52	131	0.51	131	0.51	133	0.52	133	0.52	135	0.52
Pro	CCU	350	1.67	352	1.67	354	1.68	352	1.67	353	1.69	354	1.69
Pro	CCC	149	0.71	151	0.72	146	0.69	150	0.71	144	0.69	146	0.7
Pro	CCA	237	1.13	237	1.13	237	1.13	239	1.14	238	1.14	238	1.14
Pro	CCG	100	0.48	101	0.48	104	0.49	100	0.48	101	0.48	100	0.48
Thr	ACU	431	1.65	430	1.65	429	1.65	430	1.65	430	1.66	432	1.65
Thr	ACC	188	0.72	186	0.71	189	0.72	191	0.73	188	0.73	190	0.73
Thr	ACA	322	1.24	323	1.24	324	1.24	321	1.23	317	1.23	323	1.24
Thr	ACG	101	0.39	102	0.39	101	0.39	101	0.39	100	0.39	101	0.39
Ala	GCU	502	1.78	504	1.78	508	1.78	506	1.78	495	1.77	501	1.77
Ala	GCC	173	0.61	173	0.61	176	0.62	170	0.6	168	0.6	170	0.6
Ala	GCA	355	1.26	359	1.27	359	1.26	360	1.27	357	1.28	360	1.27
Ala	GCG	98	0.35	98	0.35	99	0.35	99	0.35	96	0.34	99	0.35
Tyr	UAU	635	1.65	638	1.65	634	1.64	634	1.64	629	1.64	637	1.65
Tyr	UAC	137	0.35	136	0.35	137	0.36	137	0.36	137	0.36	137	0.35
TER	UAA	31	1.86	32	1.88	32	1.88	31	1.82	31	1.82	31	1.82
TER	UAG	11	0.66	11	0.65	11	0.65	11	0.65	12	0.71	11	0.65
TER	UGA	8	0.48	8	0.47	8	0.47	9	0.53	8	0.47	9	0.53
His	CAU	379	1.54	383	1.54	387	1.55	382	1.54	383	1.55	387	1.55
His	CAC	114	0.46	115	0.46	113	0.45	115	0.46	111	0.45	112	0.45
Gln	CAA	588	1.57	589	1.56	596	1.56	586	1.56	584	1.56	591	1.57
Gln	CAG	162	0.43	164	0.44	166	0.44	164	0.44	163	0.44	164	0.43
Asn	AAU	800	1.57	807	1.57	790	1.56	803	1.58	797	1.58	802	1.57
Asn	AAC	218	0.43	218	0.43	220	0.44	216	0.42	214	0.42	217	0.43
Lys	AAA	869	1.57	877	1.57	875	1.56	882	1.57	871	1.57	878	1.57
Lys	AAG	235	0.43	237	0.43	247	0.44	240	0.43	240	0.43	241	0.43
Asp	GAU	674	1.56	676	1.56	680	1.57	676	1.56	672	1.56	675	1.56
Asp	GAC	190	0.44	191	0.44	187	0.43	192	0.44	191	0.44	191	0.44
Glu	GAA	873	1.56	878	1.57	880	1.56	875	1.56	873	1.56	879	1.56
Glu	GAG	243	0.44	243	0.43	246	0.44	244	0.44	247	0.44	249	0.44
Cys	UGU	172	1.54	175	1.56	176	1.54	174	1.55	173	1.53	173	1.53
Cys	UGC	51	0.46	50	0.44	52	0.46	51	0.45	53	0.47	53	0.47
Trp	UGG	374	1	376	1	378	1	376	1	363	1	378	1
Arg	CGU	296	1.47	302	1.48	296	1.45	302	1.48	295	1.46	297	1.46
Arg	CGC	68	0.34	68	0.33	71	0.35	68	0.33	70	0.35	71	0.35
Arg	CGA	278	1.38	282	1.38	286	1.4	282	1.38	280	1.38	283	1.39
Arg	CGG	81	0.4	81	0.4	81	0.4	80	0.39	81	0.4	79	0.39
Ser	AGU	321	1.26	325	1.26	329	1.28	327	1.27	326	1.28	326	1.27
Ser	AGC	84	0.33	85	0.33	86	0.33	85	0.33	84	0.33	86	0.33
Arg	AGA	349	1.73	356	1.74	353	1.73	354	1.73	353	1.74	355	1.74
Arg	AGG	138	0.68	139	0.68	137	0.67	139	0.68	135	0.67	137	0.67
Gly	GGU	484	1.39	484	1.39	476	1.37	486	1.39	475	1.37	480	1.37
Gly	GGC	131	0.38	129	0.37	131	0.38	130	0.37	129	0.37	132	0.38
Gly	GGA	578	1.66	582	1.67	576	1.65	583	1.67	575	1.66	581	1.66
Gly	GGG	199	0.57	202	0.58	210	0.6	198	0.57	203	0.59	204	0.58
