# Supplementary material for: Insights into the phylogenetic relationships and species boundaries of the Myricaria squamosa complex (Tamaricaceae) based on the complete chloroplast genome
Source: PeerJ. 2023 Dec 11;11:e16642. doi: 10.7717/peerj.16642 (PMC10720482; doi:10.7717/peerj.16642)
Supplement: Supplemental Information 5 [file peerj-11-16642-s005.xlsx]

## Sheet: Sheet1
Table S4. Ka/Ks ratios of 80 protein-coding genes (PCGs) of five Myricaria chloroplast genomes in comparison with M. laxiflora (OP778385).
Genes	M. squamosa complex P2 OP778389			M. squamosa complex P1 OP778402			M. rosea OP778411			M. wardii OP778414			M. elegans OP778417
	Ka	Ks	Ka/Ks	Ka	Ks	Ka/Ks	Ka	Ks	Ka/Ks	Ka	Ks	Ka/Ks	Ka	Ks	Ka/Ks
accD	0.000831	0.019321	0.043033	0.001665	0.016032	0.103834	0.003335	0.025769	0.129405	0.003335	0.025769	0.129405	0.00417	0.022514	0.185212
atpA	NA	0.005385	0	NA	0.005385	0	0.001744	0.013529	0.128908	0.001744	0.013529	0.128908	0.000871	0.019028	0.045788
atpB	0.001781	0.002709	0.657597	0.001781	0.002709	0.657597	0.002673	0.008156	0.327803	0.002673	0.008156	0.327803	0.002673	0.008156	0.327803
atpE	NA	NA	NA	NA	NA	NA	NA	0.021918	0	NA	0.021918	0	NA	0.02201	0
atpF	NA	NA	NA	NA	NA	NA	NA	NA	NA	NA	NA	NA	NA	0.00828	0
atpH	NA	0.015279	0	NA	0.015279	0	NA	0.015279	0	NA	0.015279	0	NA	NA	NA
atpI	NA	NA	NA	NA	NA	NA	0.001784	0.011201	0.159304	0.001784	0.011201	0.159304	0.005372	0.005558	0.966557
ccsA	0.003329	0.011984	0.277767	0.003329	0.021711	0.153321	0.008018	0.02412	0.332414	0.009358	0.02416	0.387345	0.008012	0.039071	0.20507
cemA	NA	NA	NA	0.001846	NA	NA	0.003698	0.028147	0.131372	0.003698	0.028147	0.131372	NA	0.013863	0
clpP	NA	0.007253	0	NA	NA	NA	NA	0.014578	0	NA	0.007253	0	NA	0.014578	0
infA	NA	NA	NA	NA	NA	NA	NA	0.018263	0	NA	0.018263	0	NA	NA	NA
matK	0.002545	0.003053	0.833516	0.002545	0.006119	0.415908	0.009802	0.013841	0.708201	0.009802	0.013841	0.708201	0.011523	0.020057	0.574538
ndhA	0.001216	0.007556	0.160936	0.002434	0.007561	0.321857	0.001217	0.022875	0.053182	0.001217	0.022875	0.053182	0.003656	0.026743	0.136713
ndhB*	0.000859	NA	NA	0.000859	NA	NA	0.000859	NA	NA	0.000859	NA	NA	0.000859	NA	NA
ndhC	0.133552	0.189244	0.705715	NA	NA	NA	NA	NA	NA	NA	NA	NA	NA	NA	NA
ndhD	0.000872	0.014561	0.059898	0.000872	0.011614	0.075116	NA	0.026392	0	NA	0.026392	0	0.003496	0.026382	0.132514
ndhE	NA	0.01436	0	NA	0.01436	0	NA	0.029	0	NA	0.029	0	NA	0.029	0
ndhF	0.002875	0.014533	0.1978	0.003451	0.008267	0.417464	0.01098	0.022988	0.47763	0.009818	0.020857	0.470723	0.009812	0.029433	0.333364
ndhG	0.002475	NA	NA	0.002475	NA	NA	0.002475	0.016007	0.154615	0.004956	0.016029	0.30919	0.002475	0.024141	0.102522
ndhH	0.002177	0.003871	0.562479	0.003267	NA	NA	0.002176	0.007771	0.280081	0.002176	0.011686	0.186235	0.002177	0.023529	0.09253
ndhI*	NA	NA	NA	NA	NA	NA	NA	NA	NA	NA	NA	NA	NA	NA	NA
ndhJ	NA	NA	NA	NA	NA	NA	NA	0.01956	0	NA	0.009716	0	NA	0.009716	0
ndhK	NA	0.005858	0	NA	0.005858	0	NA	0.036233	0	0.001739	0.023706	0.073373	0.003483	0.0237	0.146961
petA	0.001354	NA	NA	0.001354	0.004428	0.305705	0.005427	0.017886	0.303432	0.005427	0.017886	0.303432	0.00271	0.01336	0.202826
petB	NA	NA	NA	NA	NA	NA	NA	NA	NA	NA	0.006444	0	NA	NA	NA
petD	NA	NA	NA	NA	NA	NA	NA	NA	NA	NA	NA	NA	NA	0.017226	0
petG	NA	NA	NA	NA	NA	NA	NA	0.036814	0	NA	0.036814	0	NA	0.036814	0
petL*	NA	NA	NA	NA	NA	NA	NA	NA	NA	NA	NA	NA	NA	NA	NA
petN*	NA	NA	NA	NA	NA	NA	NA	NA	NA	NA	NA	NA	NA	NA	NA
psaA	NA	0.001904	0	NA	0.003812	0	NA	0.005721	0	NA	0.005721	0	0.511692	0.506424	1.0104
psaB	NA	0.001994	0	NA	0.001994	0	0.925376	1.007	0.918946	0.208833	0.202821	1.02964	NA	0.016095	0
psaC	NA	0.01826	0	NA	0.01826	0	NA	0.01826	0	NA	0.01826	0	NA	0.01826	0
psaI	NA	0.0386	0	NA	0.0386	0	NA	0.0386	0	NA	0.0386	0	NA	0.0386	0
psaJ	NA	NA	NA	NA	NA	NA	NA	0.018923	0	NA	0.018923	0	0.022086	0.019034	1.16034
psbA	NA	NA	NA	NA	NA	NA	NA	0.004078	0	NA	0.008178	0	NA	0.008178	0
psbB	NA	NA	NA	NA	NA	NA	NA	0.005546	0	NA	0.005546	0	NA	0.016764	0
psbC	NA	NA	NA	NA	NA	NA	NA	0.008682	0	NA	0.008682	0	NA	0.008682	0
psbD	NA	0.00402	0	NA	0.00402	0	NA	0.012118	0	NA	0.016201	0	NA	0.008063	0
psbE*	NA	NA	NA	NA	NA	NA	NA	NA	NA	NA	NA	NA	NA	NA	NA
psbF*	NA	NA	NA	NA	NA	NA	NA	NA	NA	NA	NA	NA	NA	NA	NA
psbH*	NA	NA	NA	NA	NA	NA	NA	NA	NA	NA	NA	NA	NA	NA	NA
psbI	NA	0.038417	0	NA	NA	NA	NA	NA	NA	NA	NA	NA	NA	NA	NA
psbJ*	NA	NA	NA	NA	NA	NA	NA	NA	NA	NA	NA	NA	NA	NA	NA
psbK*	NA	NA	NA	NA	NA	NA	NA	NA	NA	NA	NA	NA	NA	NA	NA
psbL	NA	NA	NA	NA	0.04158	0	NA	NA	NA	NA	NA	NA	NA	NA	NA
psbM*	NA	NA	NA	NA	NA	NA	NA	NA	NA	NA	NA	NA	NA	NA	NA
psbN*	NA	NA	NA	NA	NA	NA	NA	NA	NA	NA	NA	NA	NA	NA	NA
psbT*	NA	NA	NA	NA	NA	NA	NA	NA	NA	NA	NA	NA	NA	NA	NA
psbZ*	NA	NA	NA	NA	NA	NA	NA	NA	NA	NA	NA	NA	NA	NA	NA
rbcL	NA	NA	NA	0.001846	NA	NA	NA	0.01184	0	NA	0.014829	0	0.000923	0.014829	0.06222
rpl14	NA	NA	NA	NA	NA	NA	NA	0.023085	0	NA	0.023085	0	NA	0.046997	0
rpl16*	NA	NA	NA	NA	NA	NA	NA	NA	NA	NA	NA	NA	NA	NA	NA
rpl2	NA	0.004947	0	NA	0.004947	0	NA	0.009926	0	NA	0.009926	0	0.001617	0.014926	0.108349
rpl20	NA	NA	NA	NA	NA	NA	0.003382	0.023182	0.145868	0.003382	0.023182	0.145868	0.003385	0.0231	0.146541
rpl22	NA	NA	NA	NA	NA	NA	0.006615	0.034369	0.192456	0.0033	0.034354	0.096072	0.020064	0.034119	0.588068
rpl23	NA	NA	NA	NA	NA	NA	NA	0.032497	0	NA	0.032497	0	NA	0.032497	0
rpl32*	NA	NA	NA	NA	NA	NA	NA	NA	NA	NA	NA	NA	NA	NA	NA
rpl33	NA	0.023524	0	NA	0.023524	0	NA	0.023524	0	NA	0.023524	0	NA	0.023524	0
rpl36*	NA	NA	NA	NA	NA	NA	NA	NA	NA	NA	NA	NA	NA	NA	NA
rpoA	0.001266	0.004557	0.277727	NA	0.004563	0	0.00507	0.004571	1.10925	0.006343	0.00917	0.691745	0.006345	0.013784	0.460315
rpoB	0.000406	0.006725	0.060385	0.000406	0.008076	0.050282	0.001219	0.010779	0.113114	0.000813	0.013502	0.060184	0.001219	0.012148	0.100347
rpoC1	0.000634474	0.00216189	0.293481	NA	0.00216189	0	0.000634318	0.00650992	0.0974388	0.000634318	0.00650992	0.0974388	0.00127005	0.00649466	0.195552
rpoC2	0.000636	0.003193	0.199067	0.000954	0.003193	0.298664	0.003822	0.007471	0.511619	0.003822	0.00855	0.446993	0.004461	0.018275	0.244123
rps11	NA	0.009458	0	NA	0.009458	0	NA	NA	NA	NA	NA	NA	NA	NA	NA
rps12*	NA	NA	NA	NA	NA	NA	NA	NA	NA	NA	NA	NA	NA	NA	NA
rps14	NA	NA	NA	NA	NA	NA	NA	NA	NA	NA	NA	NA	NA	0.02967	0
rps15	NA	NA	NA	NA	NA	NA	0.004823	NA	NA	0.004823	NA	NA	0.004824	0.016295	0.296052
rps16	NA	NA	NA	NA	NA	NA	0.010446	0.017085	0.611427	0.010446	0.017085	0.611427	0.010465	NA	NA
rps18	NA	NA	NA	NA	NA	NA	0.0043	0.029225	0.147136	0.0043	0.029225	0.147136	0.0043	0.029225	0.147136
rps19	NA	0.015547	0	NA	0.015547	0	NA	0.015547	0	NA	0.015547	0	NA	0.015547	0
rps2	NA	NA	NA	NA	0.006186	0	0.001834	NA	NA	0.001834	NA	NA	NA	0.006186	0
rps3	NA	NA	NA	NA	0.006757	0	0.001979	0.013623	0.145299	0.001979	0.013623	0.145299	0.003967	0.013591	0.291877
rps4	NA	NA	NA	NA	NA	NA	0.00434	0.007132	0.608541	0.00434	NA	NA	0.00434	0.007132	0.608541
rps7*	NA	NA	NA	NA	NA	NA	0.002866	NA	NA	0.002866	NA	NA	NA	NA	NA
rps8	NA	0.010341	0	NA	0.010341	0	NA	0.020751	0	NA	0.020751	0	0.003292	0.020788	0.158352
ycf1	0.005485	0.002737	2.00382	0.005026	0.002738	1.83562	0.013672	0.009621	1.42111	0.013902	0.010551	1.31758	0.016919	0.017995	0.940218
ycf2	0.000745	NA	NA	0.000745	NA	NA	0.001862	0.001351	1.3789	0.001862	0.001351	1.3789	0.002235	0.002704	0.826773
ycf3	NA	NA	NA	NA	NA	NA	NA	NA	NA	NA	NA	NA	NA	0.008942	0
ycf4	NA	0.007708	0	NA	0.007708	0	NA	0.023365	0	NA	0.015495	0	0.004763	0.023302	0.2044
ycf68*	NA	NA	NA	NA	NA	NA	NA	NA	NA	NA	NA	NA	NA	NA	NA
All genes	0.157605	0.286205	0.55	0.0238158	0.0924479	0.26	1.03791	1.38556	0.75	0.319207	0.609116	0.52	0.681987	1.09347	0.62
Note: Genes with a red mark had no nonsynonymous rate change. Genes with both the red and * marks, as well as the ndhB and rps7 genes, had no synonymous rate change.
