# Supplementary material for: Insights into the phylogenetic relationships and species boundaries of the Myricaria squamosa complex (Tamaricaceae) based on the complete chloroplast genome
Source: PeerJ. 2023 Dec 11;11:e16642. doi: 10.7717/peerj.16642 (PMC10720482; doi:10.7717/peerj.16642)
Supplement: Supplemental Information 6 — p1 = Mononucleotide; p2 = Di nucleotide; p3 = Tri nucleotide; p4 = Tetra nucleotide and c = Compound repeat microsatellites. [file peerj-11-16642-s006.xlsx]

## Sheet: Sheet1
Table S5. Simple Sequence Repeats (SSRs) identified in six representative plastomes of Myricaria. p1 = Mononucleotide; p2 = Di nucleotide; p3 = Tri nucleotide; p4 = Tetra nucleotide and c = Compound repeat microsatellites.
sample information	SSR nr.	SSR type	SSR	size	start	end	location	Region
M. squamosa complex P1 (GenBank accecssion: OP778402)	1	c	(A)10tttcagagcatata(AT)5	34	107	140	IGR(trnH-GUG,psbA)	LSC
	2	p1	(A)11	11	1694	1704	trnK-UUU-intron1	LSC
	3	p1	(T)11	11	2197	2207	trnK-UUU-intron1,matK	LSC
	4	p3	(AAT)4	12	2838	2849	trnK-UUU-intron1,matK	LSC
	5	p4	(TTTC)3	12	3657	3668	trnK-UUU-intron1	LSC
	6	p1	(T)17	17	6621	6637	IGR(rps16,trnQ-UUG)	LSC
	7	p1	(A)10	10	6848	6857	IGR(rps16,trnQ-UUG)	LSC
	8	p1	(A)14	14	7839	7852	IGR(psbK,psbI)	LSC
	9	p1	(A)10	10	8696	8705	IGR(trnS-GCU,trnG-UCC)	LSC
	10	p3	(TTA)4	12	10093	10104	IGR(trnR-UCU,atpA)	LSC
	11	p1	(A)17	17	11704	11720	IGR(atpA,atpF)	LSC
	12	p1	(A)10	10	13697	13706	IGR(atpH,atpI)	LSC
	13	p1	(T)14	14	18278	18291	rpoC2	LSC
	14	p2	(AT)5	10	20674	20683	rpoC1-exon2	LSC
	15	p1	(A)11	11	22347	22357	rpoC1-intron1	LSC
	16	p1	(T)10	10	25993	26002	rpoB	LSC
	17	p2	(TA)6	12	27401	27412	IGR(rpoB,trnC-GCA)	LSC
	18	p1	(T)10	10	28941	28950	IGR(petN,psbM)	LSC
	19	p1	(A)10	10	30614	30623	IGR(psbM,trnD-GUC)	LSC
	20	p1	(T)10	10	31523	31532	IGR(trnE-UUC,trnT-GGU)	LSC
	21	p2	(AT)6	12	32179	32190	IGR(trnE-UUC,trnT-GGU)	LSC
	22	p2	(TA)5	10	32836	32845	IGR(trnT-GGU,psbD)	LSC
	23	p1	(T)10	10	33057	33066	IGR(trnT-GGU,psbD)	LSC
	24	p4	(ATTT)3	12	36169	36180	IGR(trnS-UGA,psbZ)	LSC
	25	p2	(TA)10	20	36947	36966	IGR(psbZ,trnG-GCC)	LSC
	26	c	(T)11gt(A)11	24	37230	37253	IGR(trnG-GCC,trnfM-CAU)	LSC
	27	p1	(A)11	11	45127	45137	ycf3-intron1	LSC
	28	p1	(T)11	11	47231	47241	IGR(rps4,trnT-UGU)	LSC
	29	p1	(T)14	14	47667	47680	IGR(trnT-UGU,trnL-UAA)	LSC
	30	p1	(A)13	13	48026	48038	IGR(trnT-UGU,trnL-UAA)	LSC
	31	p1	(T)14	14	48779	48792	trnL-UAA-intron1	LSC
	32	p1	(T)11	11	49008	49018	IGR(trnL-UAA,trnF-GAA)	LSC
	33	p1	(T)14	14	52163	52176	IGR(ndhC,trnV-UAC)	LSC
	34	p1	(A)13	13	52591	52603	IGR(ndhC,trnV-UAC)	LSC
	35	p2	(TC)5	10	61781	61790	cemA	LSC
	36	c	(T)10gaaaaatcgtgaaaagagatccttttttttatacg(A)10	55	64306	64360	IGR(petA,psbJ)	LSC
	37	p1	(A)10	10	65720	65729	IGR(psbE,petL)	LSC
	38	p1	(A)10	10	66282	66291	IGR(petL,petG)	LSC
	39	p1	(A)14	14	67513	67526	IGR(psaJ,rpl33)	LSC
	40	p1	(A)10	10	68850	68859	IGR(rps18,rpl20)	LSC
	41	p1	(T)10	10	69990	69999	IGR(rpl20,rps12/rps12-2)	LSC
	42	p1	(A)11	11	71094	71104	clpP-intron2	LSC
	43	p1	(A)12	12	75724	75735	petB-intron1	LSC
	44	p1	(A)10	10	77248	77257	petD-intron1	LSC
	45	p1	(T)10	10	77500	77509	petD-intron1	LSC
	46	p1	(A)11	11	78260	78270	IGR(petD,rpoA)	LSC
	47	p1	(T)11	11	81096	81106	rpl14(partical:18.18%)	LSC
	48	p1	(T)10	10	82198	82207	rpl16-intron1	LSC
	49	c	(TA)5ttagatctg(TTTC)3	31	82665	82695	rpl16-intron1	LSC
	50	p4	(CAAT)3	12	88923	88934	ycf2	IRb
	51	p3	(CTT)4	12	90797	90808	ycf2	IRb
	52	p2	(TA)8	16	94772	94787	IGR(trnL-CAA,ndhB)	IRb
	53	p1	(A)10	10	112918	112927	IGR(ndhF,rpl32)	SSC
	54	p3	(ATA)4	12	113571	113582	IGR(rpl32,trnL-UAG)	SSC
	55	p1	(T)11	11	114059	114069	IGR(rpl32,trnL-UAG)	SSC
	56	p2	(AT)7	14	114246	114259	IGR(rpl32,trnL-UAG)	SSC
	57	p1	(A)10	10	114782	114791	IGR(rpl32,trnL-UAG)	SSC
	58	p1	(T)11	11	116233	116243	IGR(ccsA,ndhD)	SSC
	59	p1	(A)10	10	117876	117885	IGR(ndhD,psaC)	SSC
	60	p4	(TTGA)3	12	118402	118413	ndhE	SSC
	61	p1	(T)12	12	121643	121654	ndhA-intron1	SSC
	62	p3	(TTA)4	12	126400	126411	ycf1	SSC
	63	p1	(T)10	10	127575	127584	ycf1	SSC
	64	p1	(T)10	10	128392	128401	ycf1	SSC
	65	p2	(TA)8	16	144283	144298	IGR(ndhB-2,trnL-CAA-2)	IRa
	66	p3	(AAG)4	12	148262	148273	ycf2-2	IRa
	67	p4	(ATTG)3	12	150136	150147	ycf2-2	IRa
M. squamosa complex P2 (GenBank accession: OP778389)	1	p2	(AT)5	10	130	139	IGR(trnH-GUG,psbA)	LSC
	2	p1	(T)11	11	2193	2203	trnK-UUU-intron1,matK	LSC
	3	p3	(AAT)4	12	2834	2845	trnK-UUU-intron1,matK	LSC
	4	p1	(C)11	11	5346	5356	rps16-intron1	LSC
	5	p1	(A)10	10	6835	6844	IGR(rps16,trnQ-UUG)	LSC
	6	p1	(A)13	13	7839	7851	IGR(psbK,psbI)	LSC
	7	p1	(A)11	11	8186	8196	IGR(trnS-GCU,trnG-UCC)	LSC
	8	p3	(TTA)4	12	10094	10105	IGR(trnR-UCU,atpA)	LSC
	9	p1	(A)14	14	11705	11718	IGR(atpA,atpF)	LSC
	10	p1	(A)10	10	13695	13704	IGR(atpH,atpI)	LSC
	11	p1	(T)14	14	18294	18307	rpoC2	LSC
	12	p2	(AT)5	10	20690	20699	rpoC1-exon2	LSC
	13	p1	(T)10	10	26009	26018	rpoB	LSC
	14	p2	(TA)7	14	27406	27419	IGR(rpoB,trnC-GCA)	LSC
	15	p1	(T)10	10	31541	31550	IGR(trnE-UUC,trnT-GGU)	LSC
	16	p2	(AT)6	12	32197	32208	IGR(trnE-UUC,trnT-GGU)	LSC
	17	p2	(TA)5	10	32854	32863	IGR(trnT-GGU,psbD)	LSC
	18	p1	(T)12	12	33075	33086	IGR(trnT-GGU,psbD)	LSC
	19	p1	(T)10	10	35958	35967	IGR(psbC,trnS-UGA)	LSC
	20	p4	(ATTT)3	12	36190	36201	IGR(trnS-UGA,psbZ)	LSC
	21	p2	(TA)10	20	36968	36987	IGR(psbZ,trnG-GCC)	LSC
	22	p1	(A)10	10	46123	46132	IGR(trnS-GGA,rps4)	LSC
	23	c	(TAT)4aataatatttttatttattatatttatatctttttttatttgtatttttgaggctatatatatc(T)10	86	47166	47251	IGR(rps4,trnT-UGU)	LSC
	24	p1	(T)16	16	47677	47692	IGR(trnT-UGU,trnL-UAA)	LSC
	25	p1	(A)14	14	48038	48051	IGR(trnT-UGU,trnL-UAA)	LSC
	26	p1	(A)10	10	48506	48515	trnL-UAA-intron1	LSC
	27	p1	(T)14	14	48793	48806	trnL-UAA-intron1	LSC
	28	p1	(T)11	11	51931	51941	IGR(ndhC,trnV-UAC)	LSC
	29	p1	(A)15	15	52356	52370	IGR(ndhC,trnV-UAC)	LSC
	30	p2	(TC)5	10	61560	61569	cemA	LSC
	31	p1	(A)11	11	64129	64139	IGR(petA,psbJ)	LSC
	32	p1	(A)10	10	65490	65499	IGR(psbE,petL)	LSC
	33	p1	(A)10	10	65748	65757	IGR(psbE,petL)	LSC
	34	p1	(A)12	12	66053	66064	IGR(petL,petG)	LSC
	35	p1	(A)11	11	67286	67296	IGR(psaJ,rpl33)	LSC
	36	p1	(A)10	10	67969	67978	IGR(rpl33,rps18)	LSC
	37	p1	(A)10	10	68637	68646	IGR(rps18,rpl20)	LSC
	38	c	(T)10ctttgagttattcttttctccgttcctggtctatgaataacaaaacttatttttccaatgtat(A)10	83	69192	69274	IGR(rpl20,rps12/rps12-2)	LSC
	39	p1	(A)10	10	70887	70896	clpP-intron2	LSC
	40	p1	(A)14	14	75509	75522	petB-intron1	LSC
	41	p1	(A)10	10	78043	78052	IGR(petD,rpoA)	LSC
	42	c	(TA)5ttagatctg(TTTC)3	31	82514	82544	rpl16-intron1	LSC
	43	p4	(CAAT)3	12	88763	88774	ycf2	IRb
	44	p3	(CTT)4	12	90637	90648	ycf2	IRb
	45	c*	(TA)6(T<A>)(A)10	24	94612	94635	IGR(trnL-CAA,ndhB)	IRb
	46	p1	(T)10	10	108159	108168	IGR(trnR-ACG,trnN-GUU)	IRb
	47	p1	(A)12	12	112719	112730	IGR(ndhF,rpl32)	SSC
	48	p3	(ATA)4	12	113365	113376	IGR(rpl32,trnL-UAG)	SSC
	49	p1	(T)11	11	113853	113863	IGR(rpl32,trnL-UAG)	SSC
	50	p2	(AT)6	12	114040	114051	IGR(rpl32,trnL-UAG)	SSC
	51	p1	(A)10	10	117658	117667	IGR(ndhD,psaC)	SSC
	52	p4	(TTGA)3	12	118184	118195	ndhE	SSC
	53	p1	(T)10	10	121431	121440	ndhA-intron1	SSC
	54	p3	(TTA)4	12	126186	126197	ycf1	SSC
	55	p1	(T)10	10	127361	127370	ycf1	SSC
	56	p1	(A)10	10	130534	130543	IGR(trnN-GUU-2,trnR-ACG-2)	IRa
	57	c*	(T)10(<T>A)(TA)6	24	144067	144090	IGR(ndhB-2,trnL-CAA-2)	IRa
	58	p3	(AAG)4	12	148054	148065	ycf2-2	IRa
	59	p4	(ATTG)3	12	149928	149939	ycf2-2	IRa
M. laxiflora (GenBank accession: OP778385)	1	c	(A)10tttcagagcatata(AT)5	34	114	147	IGR(trnH-GUG,psbA)	LSC
	2	p1	(A)10	10	1702	1711	trnK-UUU-intron1	LSC
	3	p1	(T)11	11	2204	2214	trnK-UUU-intron1,matK	LSC
	4	p3	(AAT)4	12	2845	2856	trnK-UUU-intron1,matK	LSC
	5	p4	(TTTC)3	12	3657	3668	trnK-UUU-intron1	LSC
	6	p1	(A)11	11	4018	4028	trnK-UUU-intron1	LSC
	7	p1	(A)11	11	4715	4725	IGR(trnK-UUU,rps16)	LSC
	8	p1	(A)11	11	6843	6853	IGR(rps16,trnQ-UUG)	LSC
	9	p1	(A)12	12	7844	7855	IGR(psbK,psbI)	LSC
	10	p1	(A)14	14	8190	8203	IGR(trnS-GCU,trnG-UCC)	LSC
	11	p3	(TTA)4	12	10110	10121	IGR(trnR-UCU,atpA)	LSC
	12	p1	(A)12	12	11721	11732	IGR(atpA,atpF)	LSC
	13	p3	(AAT)4	12	13151	13162	IGR(atpF,atpH)	LSC
	14	p1	(A)10	10	13709	13718	IGR(atpH,atpI)	LSC
	15	p1	(T)14	14	18276	18289	rpoC2	LSC
	16	p2	(AT)5	10	20672	20681	rpoC1-exon2	LSC
	17	p1	(T)10	10	25990	25999	rpoB	LSC
	18	p1	(A)12	12	30590	30601	IGR(psbM,trnD-GUC)	LSC
	19	p1	(T)12	12	31501	31512	IGR(trnE-UUC,trnT-GGU)	LSC
	20	p2	(AT)6	12	32493	32504	IGR(trnE-UUC,trnT-GGU)	LSC
	21	p2	(TA)5	10	33151	33160	IGR(trnT-GGU,psbD)	LSC
	22	p1	(A)10	10	33311	33320	IGR(trnT-GGU,psbD)	LSC
	23	p1	(T)12	12	36252	36263	IGR(psbC,trnS-UGA)	LSC
	24	p4	(ATTT)3	12	36486	36497	IGR(trnS-UGA,psbZ)	LSC
	25	p2	(TA)18	36	37264	37299	IGR(psbZ,trnG-GCC)	LSC
	26	p1	(T)10	10	37563	37572	IGR(trnG-GCC,trnfM-CAU)	LSC
	27	c	(TA)6(T)12	24	47565	47588	IGR(rps4,trnT-UGU)	LSC
	28	p1	(T)12	12	48019	48030	IGR(trnT-UGU,trnL-UAA)	LSC
	29	p1	(A)16	16	48363	48378	IGR(trnT-UGU,trnL-UAA)	LSC
	30	p1	(A)10	10	48833	48842	trnL-UAA-intron1	LSC
	31	p1	(A)14	14	52827	52840	IGR(ndhC,trnV-UAC)	LSC
	32	p2	(TC)5	10	62029	62038	cemA	LSC
	33	p1	(A)10	10	64605	64614	IGR(petA,psbJ)	LSC
	34	p1	(A)10	10	65965	65974	IGR(psbE,petL)	LSC
	35	p1	(A)10	10	66528	66537	IGR(petL,petG)	LSC
	36	p1	(A)12	12	67759	67770	IGR(psaJ,rpl33)	LSC
	37	p4	(TTAT)3	12	67885	67896	IGR(psaJ,rpl33)	LSC
	38	p1	(A)10	10	69095	69104	IGR(rps18,rpl20)	LSC
	39	p4	(ATTT)3	12	75531	75542	IGR(psbH,petB)	LSC
	40	p1	(A)10	10	77501	77510	petD-intron1	LSC
	41	p1	(A)10	10	78510	78519	IGR(petD,rpoA)	LSC
	42	p1	(T)10	10	81339	81348	rpl14(partical:20.00%)	LSC
	43	c	(TA)6ttagatctg(TTTC)3	33	82976	83008	rpl16-intron1	LSC
	44	p4	(CAAT)3	12	89236	89247	ycf2	IRb
	45	p3	(CTT)4	12	91110	91121	ycf2	IRb
	46	p2	(TA)8	16	95085	95100	IGR(trnL-CAA,ndhB)	IRb
	47	p1	(T)10	10	108627	108636	IGR(trnR-ACG,trnN-GUU)	IRb
	48	p1	(A)11	11	113232	113242	IGR(ndhF,rpl32)	SSC
	49	p3	(ATA)4	12	113884	113895	IGR(rpl32,trnL-UAG)	SSC
	50	p1	(T)13	13	114373	114385	IGR(rpl32,trnL-UAG)	SSC
	51	p2	(AT)7	14	114562	114575	IGR(rpl32,trnL-UAG)	SSC
	52	p1	(A)11	11	115050	115060	IGR(rpl32,trnL-UAG)	SSC
	53	p1	(A)10	10	118114	118123	IGR(ndhD,psaC)	SSC
	54	p1	(A)10	10	119273	119282	ndhG	SSC
	55	p3	(TTA)4	12	126641	126652	ycf1	SSC
	56	p1	(T)10	10	127816	127825	ycf1	SSC
	57	p1	(T)10	10	128633	128642	ycf1	SSC
	58	p1	(A)10	10	130989	130998	IGR(trnN-GUU-2,trnR-ACG-2)	IRa
	59	p2	(TA)8	16	144525	144540	IGR(ndhB-2,trnL-CAA-2)	IRa
	60	p3	(AAG)4	12	148504	148515	ycf2-2	IRa
	61	p4	(ATTG)3	12	150378	150389	ycf2-2	IRa
M. rosea (GenBank accession: OP778411)	1	p2	(AT)5	10	130	139	IGR(trnH-GUG,psbA)	LSC
	2	p1	(A)11	11	1692	1702	trnK-UUU-intron1	LSC
	3	p1	(T)11	11	2195	2205	trnK-UUU-intron1,matK	LSC
	4	p3	(AAT)4	12	2836	2847	trnK-UUU-intron1,matK	LSC
	5	p1	(A)10	10	4701	4710	IGR(trnK-UUU,rps16)	LSC
	6	p1	(T)10	10	4843	4852	rps16-exon2(partical:20.00%)	LSC
	7	p1	(T)10	10	6232	6241	IGR(rps16,trnQ-UUG)	LSC
	8	p1	(T)10	10	6754	6763	IGR(rps16,trnQ-UUG)	LSC
	9	p1	(A)12	12	7831	7842	IGR(psbK,psbI)	LSC
	10	p1	(A)10	10	8177	8186	IGR(trnS-GCU,trnG-UCC)	LSC
	11	p3	(TTA)4	12	10093	10104	IGR(trnR-UCU,atpA)	LSC
	12	p1	(A)15	15	11704	11718	IGR(atpA,atpF)	LSC
	13	p1	(A)11	11	13681	13691	IGR(atpH,atpI)	LSC
	14	p2	(TA)5	10	14203	14212	IGR(atpH,atpI)	LSC
	15	p1	(T)14	14	18257	18270	rpoC2	LSC
	16	p2	(AT)5	10	20654	20663	rpoC1-exon2	LSC
	17	p1	(T)10	10	25971	25980	rpoB	LSC
	18	p2	(TA)5	10	27351	27360	IGR(rpoB,trnC-GCA)	LSC
	19	p1	(T)10	10	28798	28807	IGR(petN,psbM)	LSC
	20	p1	(A)12	12	30590	30601	IGR(psbM,trnD-GUC)	LSC
	21	p1	(T)10	10	31509	31518	IGR(trnE-UUC,trnT-GGU)	LSC
	22	p2	(AT)6	12	31705	31716	IGR(trnE-UUC,trnT-GGU)	LSC
	23	p2	(AT)6	12	32317	32328	IGR(trnE-UUC,trnT-GGU)	LSC
	24	p2	(TA)14	28	37068	37095	IGR(psbZ,trnG-GCC)	LSC
	25	p1	(A)13	13	37375	37387	IGR(trnG-GCC,trnfM-CAU)	LSC
	26	p1	(A)12	12	45518	45529	IGR(ycf3,trnS-GGA)	LSC
	27	p1	(A)12	12	46260	46271	IGR(trnS-GGA,rps4)	LSC
	28	c	(TA)6(T)13	25	47368	47392	IGR(rps4,trnT-UGU)	LSC
	29	p1	(A)11	11	48154	48164	IGR(trnT-UGU,trnL-UAA)	LSC
	30	p1	(T)10	10	49131	49140	IGR(trnL-UAA,trnF-GAA)	LSC
	31	p1	(A)10	10	49754	49763	IGR(trnF-GAA,ndhJ)	LSC
	32	p1	(A)10	10	52689	52698	IGR(ndhC,trnV-UAC)	LSC
	33	p5	(AATTG)3	15	58051	58065	IGR(rbcL,accD)	LSC
	34	p2	(TC)5	10	61922	61931	cemA	LSC
	35	p1	(A)10	10	63815	63824	IGR(petA,psbJ)	LSC
	36	c	(T)11gaaaaatcgtgaaaagagatcctttttttttatacg(A)11	58	64432	64489	IGR(petA,psbJ)	LSC
	37	p1	(A)12	12	65838	65849	IGR(psbE,petL)	LSC
	38	p1	(A)10	10	66054	66063	IGR(psbE,petL)	LSC
	39	p1	(A)13	13	66399	66411	IGR(petL,petG)	LSC
	40	p4	(TATT)3	12	67744	67755	IGR(psaJ,rpl33)	LSC
	41	p1	(A)10	10	68294	68303	IGR(rpl33,rps18)	LSC
	42	p1	(A)11	11	71179	71189	clpP-intron2	LSC
	43	p1	(A)10	10	75816	75825	petB-intron1	LSC
	44	p1	(A)10	10	77347	77356	petD-intron1	LSC
	45	p1	(T)12	12	78340	78351	IGR(petD,rpoA)	LSC
	46	c	(TA)5ttagatctg(TTTC)3	31	82837	82867	rpl16-intron1	LSC
	47	p4	(CAAT)3	12	89086	89097	ycf2	IRb
	48	p3	(CTT)4	12	90960	90971	ycf2	IRb
	49	p2	(TA)8	16	94939	94954	IGR(trnL-CAA,ndhB)	IRb
	50	p1	(T)10	10	108612	108621	IGR(trnR-ACG,trnN-GUU)	IRb
	51	p1	(A)10	10	108743	108752	IGR(trnR-ACG,trnN-GUU)	IRb
	52	p1	(G)10	10	113240	113249	IGR(ndhF,rpl32)	SSC
	53	c	(ATA)4aatgtcatggggttttatataaaatg(AAAAT)3	53	113868	113920	IGR(rpl32,trnL-UAG)	SSC
	54	p1	(T)11	11	114352	114362	IGR(rpl32,trnL-UAG)	SSC
	55	p2	(AT)6	12	114539	114550	IGR(rpl32,trnL-UAG)	SSC
	56	p1	(A)12	12	118161	118172	IGR(ndhD,psaC)	SSC
	57	p4	(TTGA)3	12	118689	118700	ndhE	SSC
	58	p1	(T)10	10	121911	121920	ndhA-intron1	SSC
	59	p3	(TTA)4	12	126675	126686	ycf1	SSC
	60	p1	(T)10	10	127850	127859	ycf1	SSC
	61	p1	(T)10	10	130893	130902	IGR(trnN-GUU-2,trnR-ACG-2)	IRa
	62	p1	(A)10	10	131024	131033	IGR(trnN-GUU-2,trnR-ACG-2)	IRa
	63	p2	(TA)8	16	144691	144706	IGR(ndhB-2,trnL-CAA-2)	IRa
	64	p3	(AAG)4	12	148674	148685	ycf2-2	IRa
	65	p4	(ATTG)3	12	150548	150559	ycf2-2	IRa
M. wardii (GenBank accession: OP778414)	1	c	(A)10tttcagagcatata(AT)5	34	107	140	IGR(trnH-GUG,psbA)	LSC
	2	p1	(A)11	11	1693	1703	trnK-UUU-intron1	LSC
	3	p1	(T)11	11	2196	2206	trnK-UUU-intron1,matK	LSC
	4	p3	(AAT)4	12	2837	2848	trnK-UUU-intron1,matK	LSC
	5	p3	(TTA)4	12	4463	4474	IGR(trnK-UUU,rps16)	LSC
	6	p1	(T)10	10	6252	6261	IGR(rps16,trnQ-UUG)	LSC
	7	p1	(T)10	10	6774	6783	IGR(rps16,trnQ-UUG)	LSC
	8	p1	(A)13	13	7862	7874	IGR(psbK,psbI)	LSC
	9	p3	(TTA)4	12	10089	10100	IGR(trnR-UCU,atpA)	LSC
	10	p1	(A)13	13	11700	11712	IGR(atpA,atpF)	LSC
	11	p1	(A)11	11	13688	13698	IGR(atpH,atpI)	LSC
	12	p2	(TA)5	10	14210	14219	IGR(atpH,atpI)	LSC
	13	p1	(T)14	14	18271	18284	rpoC2	LSC
	14	p2	(AT)5	10	20668	20677	rpoC1-exon2	LSC
	15	p1	(T)10	10	25991	26000	rpoB	LSC
	16	p2	(TA)5	10	27371	27380	IGR(rpoB,trnC-GCA)	LSC
	17	p1	(T)10	10	27742	27751	IGR(rpoB,trnC-GCA)	LSC
	18	p1	(T)10	10	28827	28836	IGR(petN,psbM)	LSC
	19	p1	(A)11	11	30606	30616	IGR(psbM,trnD-GUC)	LSC
	20	p2	(AT)7	14	31712	31725	IGR(trnE-UUC,trnT-GGU)	LSC
	21	p2	(AT)6	12	32498	32509	IGR(trnE-UUC,trnT-GGU)	LSC
	22	p2	(TA)10	20	37213	37232	IGR(psbZ,trnG-GCC)	LSC
	23	p1	(A)12	12	37511	37522	IGR(trnG-GCC,trnfM-CAU)	LSC
	24	p1	(A)10	10	45645	45654	IGR(ycf3,trnS-GGA)	LSC
	25	p1	(A)13	13	46380	46392	IGR(trnS-GGA,rps4)	LSC
	26	p1	(T)11	11	47215	47225	IGR(rps4,trnT-UGU)	LSC
	27	c	(TA)5(T)11	21	47491	47511	IGR(rps4,trnT-UGU)	LSC
	28	p1	(A)10	10	48273	48282	IGR(trnT-UGU,trnL-UAA)	LSC
	29	p1	(A)10	10	48852	48861	trnL-UAA-intron1	LSC
	30	p1	(T)10	10	49025	49034	trnL-UAA-intron1	LSC
	31	p1	(T)10	10	49250	49259	IGR(trnL-UAA,trnF-GAA)	LSC
	32	p1	(A)11	11	52824	52834	IGR(ndhC,trnV-UAC)	LSC
	33	p5	(AATTG)3	15	58182	58196	IGR(rbcL,accD)	LSC
	34	p2	(TC)5	10	62053	62062	cemA	LSC
	35	p1	(T)13	13	64562	64574	IGR(petA,psbJ)	LSC
	36	p1	(A)11	11	65968	65978	IGR(psbE,petL)	LSC
	37	p1	(A)11	11	66183	66193	IGR(psbE,petL)	LSC
	38	p1	(A)11	11	66529	66539	IGR(petL,petG)	LSC
	39	p1	(A)10	10	67748	67757	IGR(psaJ,rpl33)	LSC
	40	p4	(TATT)3	12	67873	67884	IGR(psaJ,rpl33)	LSC
	41	p1	(A)11	11	68429	68439	IGR(rpl33,rps18)	LSC
	42	p1	(A)10	10	71334	71343	clpP-intron2	LSC
	43	p1	(A)12	12	78500	78511	IGR(petD,rpoA)	LSC
	44	p1	(T)10	10	80091	80100	IGR(rps11,rpl36)	LSC
	45	c	(TA)5ttagatctg(TTTC)3	31	82976	83006	rpl16-intron1	LSC
	46	p4	(CAAT)3	12	89225	89236	ycf2	IRb
	47	p3	(CTT)4	12	91099	91110	ycf2	IRb
	48	p2	(TA)10	20	95078	95097	IGR(trnL-CAA,ndhB)	IRb
	49	p1	(T)10	10	108760	108769	IGR(trnR-ACG,trnN-GUU)	IRb
	50	p1	(A)10	10	108891	108900	IGR(trnR-ACG,trnN-GUU)	IRb
	51	c	(ATA)4aatgtcatggggttttatataaaatg(AAAAT)3	53	114010	114062	IGR(rpl32,trnL-UAG)	SSC
	52	p2	(AT)6	12	114679	114690	IGR(rpl32,trnL-UAG)	SSC
	53	p1	(T)12	12	114838	114849	IGR(rpl32,trnL-UAG)	SSC
	54	p1	(A)12	12	118304	118315	IGR(ndhD,psaC)	SSC
	55	p4	(TTGA)3	12	118832	118843	ndhE	SSC
	56	p3	(TTA)4	12	126817	126828	ycf1	SSC
	57	p1	(T)10	10	127992	128001	ycf1	SSC
	58	p1	(T)10	10	131035	131044	IGR(trnN-GUU-2,trnR-ACG-2)	IRa
	59	p1	(A)10	10	131166	131175	IGR(trnN-GUU-2,trnR-ACG-2)	IRa
	60	p2	(TA)10	20	144838	144857	IGR(ndhB-2,trnL-CAA-2)	IRa
	61	p3	(AAG)4	12	148825	148836	ycf2-2	IRa
	62	p4	(ATTG)3	12	150699	150710	ycf2-2	IRa
M. elegans (GenBank accesion: OP778417)	1	p1	(A)10	10	1694	1703	trnK-UUU-intron1	LSC
	2	p1	(T)11	11	2203	2213	trnK-UUU-intron1,matK	LSC
	3	p3	(AAT)4	12	2844	2855	trnK-UUU-intron1,matK	LSC
	4	p4	(TTTC)3	12	3656	3667	trnK-UUU-intron1	LSC
	5	p1	(A)10	10	4703	4712	IGR(trnK-UUU,rps16)	LSC
	6	p4	(ATTT)3	12	5528	5539	rps16-intron1	LSC
	7	p1	(A)10	10	6853	6862	IGR(rps16,trnQ-UUG)	LSC
	8	p1	(A)14	14	7860	7873	IGR(psbK,psbI)	LSC
	9	p3	(TTA)4	12	10137	10148	IGR(trnR-UCU,atpA)	LSC
	10	p1	(A)12	12	11748	11759	IGR(atpA,atpF)	LSC
	11	p1	(A)10	10	13735	13744	IGR(atpH,atpI)	LSC
	12	p1	(T)14	14	18317	18330	rpoC2	LSC
	13	p2	(AT)5	10	20714	20723	rpoC1-exon2	LSC
	14	p1	(T)10	10	26032	26041	rpoB	LSC
	15	p2	(AT)9	18	27415	27432	IGR(rpoB,trnC-GCA)	LSC
	16	p2	(AT)5	10	28319	28328	IGR(trnC-GCA,petN)	LSC
	17	p1	(T)10	10	28953	28962	IGR(petN,psbM)	LSC
	18	p2	(AT)5	10	31727	31736	IGR(trnE-UUC,trnT-GGU)	LSC
	19	p2	(AT)12	24	32513	32536	IGR(trnE-UUC,trnT-GGU)	LSC
	20	p2	(TA)18	36	37291	37326	IGR(psbZ,trnG-GCC)	LSC
	21	p1	(A)14	14	45735	45748	IGR(ycf3,trnS-GGA)	LSC
	22	p1	(A)12	12	46456	46467	IGR(trnS-GGA,rps4)	LSC
	23	c	(TA)7(T)11	25	47568	47592	IGR(rps4,trnT-UGU)	LSC
	24	p1	(A)11	11	48388	48398	IGR(trnT-UGU,trnL-UAA)	LSC
	25	p1	(T)11	11	49367	49377	IGR(trnL-UAA,trnF-GAA)	LSC
	26	p1	(T)11	11	52461	52471	IGR(ndhC,trnV-UAC)	LSC
	27	p1	(A)11	11	52924	52934	IGR(ndhC,trnV-UAC)	LSC
	28	p1	(T)10	10	58693	58702	IGR(rbcL,accD)	LSC
	29	p2	(TC)5	10	62150	62159	cemA	LSC
	30	c	(T)10atacg(A)10	25	64661	64685	IGR(petA,psbJ)	LSC
	31	p1	(A)11	11	66235	66245	IGR(psbE,petL)	LSC
	32	p1	(T)12	12	66473	66484	IGR(petL,petG)	LSC
	33	p1	(A)11	11	66588	66598	IGR(petL,petG)	LSC
	34	p1	(A)11	11	67813	67823	IGR(psaJ,rpl33)	LSC
	35	p1	(A)10	10	69137	69146	IGR(rps18,rpl20)	LSC
	36	p1	(A)10	10	69762	69771	IGR(rpl20,rps12/rps12-2)	LSC
	37	p1	(A)11	11	71373	71383	clpP-intron2	LSC
	38	p1	(A)10	10	77542	77551	petD-intron1	LSC
	39	p1	(A)10	10	78562	78571	IGR(petD,rpoA)	LSC
	40	p1	(T)11	11	82508	82518	rpl16-intron1	LSC
	41	c	(TA)5ttagatctg(TTTC)3	31	83032	83062	rpl16-intron1	LSC
	42	p4	(CAAT)3	12	89290	89301	ycf2	IRb
	43	p3	(CTT)4	12	91164	91175	ycf2	IRb
	44	p2	(TA)6	12	95144	95155	IGR(trnL-CAA,ndhB)	IRb
	45	p1	(T)10	10	108822	108831	IGR(trnR-ACG,trnN-GUU)	IRb
	46	p1	(T)11	11	113726	113736	IGR(ndhF,rpl32)	SSC
	47	p3	(ATA)4	12	114040	114051	IGR(rpl32,trnL-UAG)	SSC
	48	p1	(T)13	13	114524	114536	IGR(rpl32,trnL-UAG)	SSC
	49	p2	(TA)6	12	114710	114721	IGR(rpl32,trnL-UAG)	SSC
	50	p1	(A)10	10	115250	115259	IGR(rpl32,trnL-UAG)	SSC
	51	p1	(A)10	10	118343	118352	IGR(ndhD,psaC)	SSC
	52	p4	(TTGA)3	12	118869	118880	ndhE	SSC
	53	p1	(A)10	10	121766	121775	ndhA-intron1	SSC
	54	p1	(T)10	10	128066	128075	ycf1	SSC
	55	p1	(T)10	10	128672	128681	ycf1	SSC
	56	p1	(A)10	10	131239	131248	IGR(trnN-GUU-2,trnR-ACG-2)	IRa
	57	p2	(TA)6	12	144915	144926	IGR(ndhB-2,trnL-CAA-2)	IRa
	58	p3	(AAG)4	12	148895	148906	ycf2-2	IRa
	59	p4	(ATTG)3	12	150769	150780	ycf2-2	IRa
